# Supplementary material
Source: publisher figshare collection journal article supplement (https://future-science-group.figshare.com/ndownloader/files/28220370)
Supplement: Supplementary file 1 [file 28220370]

**Supplemental Materials**

**Supplemental Material 01: Search query details**

| **Search query strings** |
| --- |
| Country [tw] AND Oncology AND real world NOT RCT NOT Randomized clinical trial [tw] NOT Randomised clinical trial [tw] |
| Country [tw] AND Oncology AND medical chart NOT RCT NOT Randomized clinical trial [tw] NOT Randomised clinical trial [tw] |
| Country [tw] AND Oncology AND claims database [tw] NOT RCT NOT Randomized clinical trial [tw] NOT Randomised clinical trial [tw] |
| Country [tw] AND Oncology AND registry [tw] NOT RCT NOT Randomized clinical trial [tw] NOT Randomised clinical trial [tw] |
| Country [tw] AND Oncology AND Medical records [tw] NOT RCT NOT Randomized clinical trial [tw] NOT Randomised clinical trial [tw] |

| **Search query details** |
| --- |
| - Publication time frame: 2015-2019 - RWE databases considered: registries, claims, medical chart (e.g., EMR/EHR, chart review, chart abstraction) - High Growth Countries considered: APAC (China, Taiwan, Hong Kong, Singapore, Malaysia, Thailand, Philippines, Indonesia, India), Latin America (LATAM) [Argentina, Brazil, Colombia, Mexico, Chile, Peru], Africa and Middle East (AFME) [Algeria, Egypt, Jordan, Kuwait, Lebanon, Morocco, Nigeria, Qatar, Saudi Arabia, South Africa, Tunisia, U.A.E.] - Additional search terms: Cancer [Any cancer], Oncology, Tumor (MeSH term applied) |
